# Supplementary material
Source: PubMed Central journal article supplement (PMC2519879)
Supplement: NIHMS62652-supplement-2si20070724_03.pdf [file NIHMS62652-supplement-2si20070724_03.pdf]

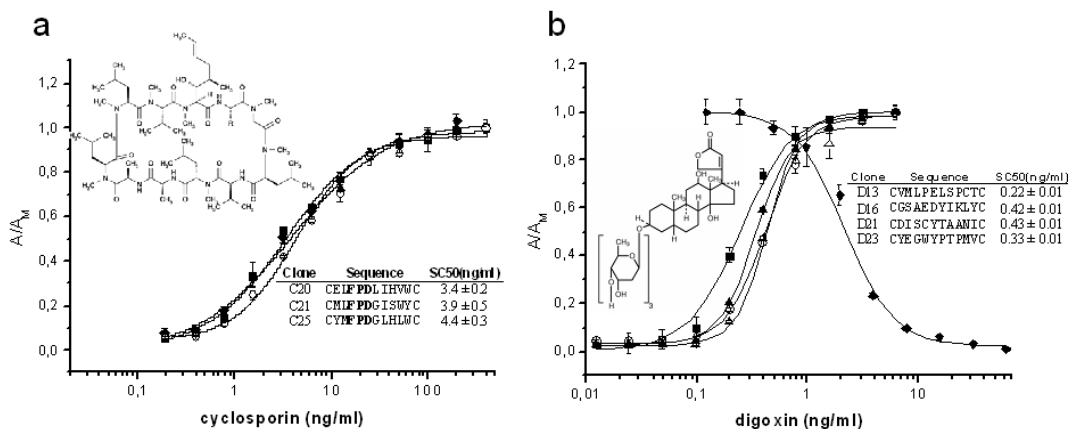

**Figure S-1. Cyclosporin and digoxin PHAIAs.** (a) noncompetitive ELISA for cyclosporin performed with different phage borne peptides; phage clone C20 (squares), C21 (diamonds) and C25 (circles). (b) noncompetitive and competitive ELISA for digoxin; phage clone D13 (squares), D16 (circles), D21 (white triangles), D26 (black triangles), and noncompetitive assay performed with the chemical hapten (diamonds). Clones sequences, their corresponding midpoint values (SC<sub>50</sub>), and chemical structures are shown as inserts.
